# Supplementary material
Source: Springer Nature journal article supplement (https://www.springermedizin.de/resource/supplementary/12913_2012_2433_MOESM1_ESM.pdf/9530534)

cum % of  
income &  
payment

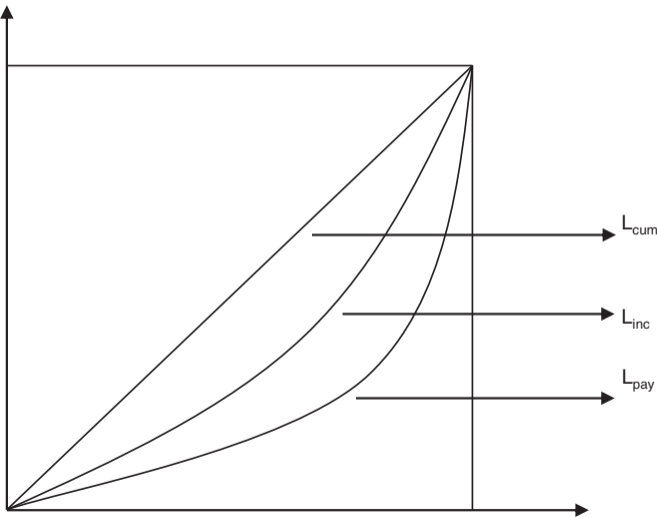

cum % of household

Supplement: MOESM1 [file 9530534]
